# Supplementary material for: Revisiting the homology modeling of G-protein coupled receptors: β1-adrenoceptor as an example
Source: Royal Society of Chemistry journal article supplement (doi:10.1039/c2mb05491d), 2012-03-28
Supplement: c2mb05491d.pdf [file c2mb05491d.pdf]

### Supplementary Information

## Revisiting the Homology Modeling of G-Protein Coupled Receptors: $\beta_1$ -Adrenoceptor as An Example

Mengyuan Zhu, Minyong Li\*

\*Department of Medicinal Chemistry, School of Pharmacy, Shandong University, Jinan, Shandong 250012, China

Tel./fax: +86-531-8838-2076; E-mail: [mli@sdu.edu.cn](mailto:mli@sdu.edu.cn)

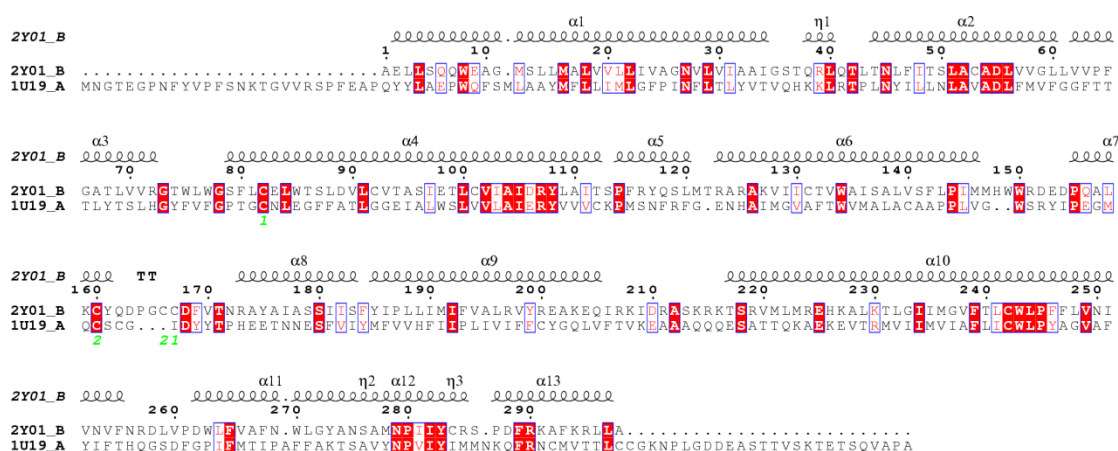

**Figure S1.** Aligned sequences of Bt\_Rho and Mg\_adrb1 with the gap opening penalty and gap extension penalty set to 10 and 3.

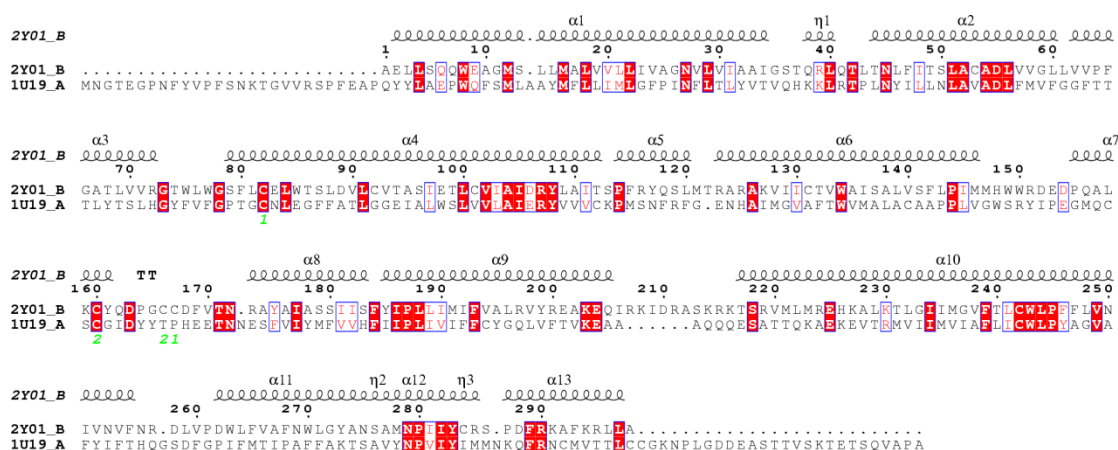

**Figure S2.** Aligned sequences of Bt\_Rho and Mg\_adrb1 with the gap opening penalty and gap extension penalty set to 10 and 1.

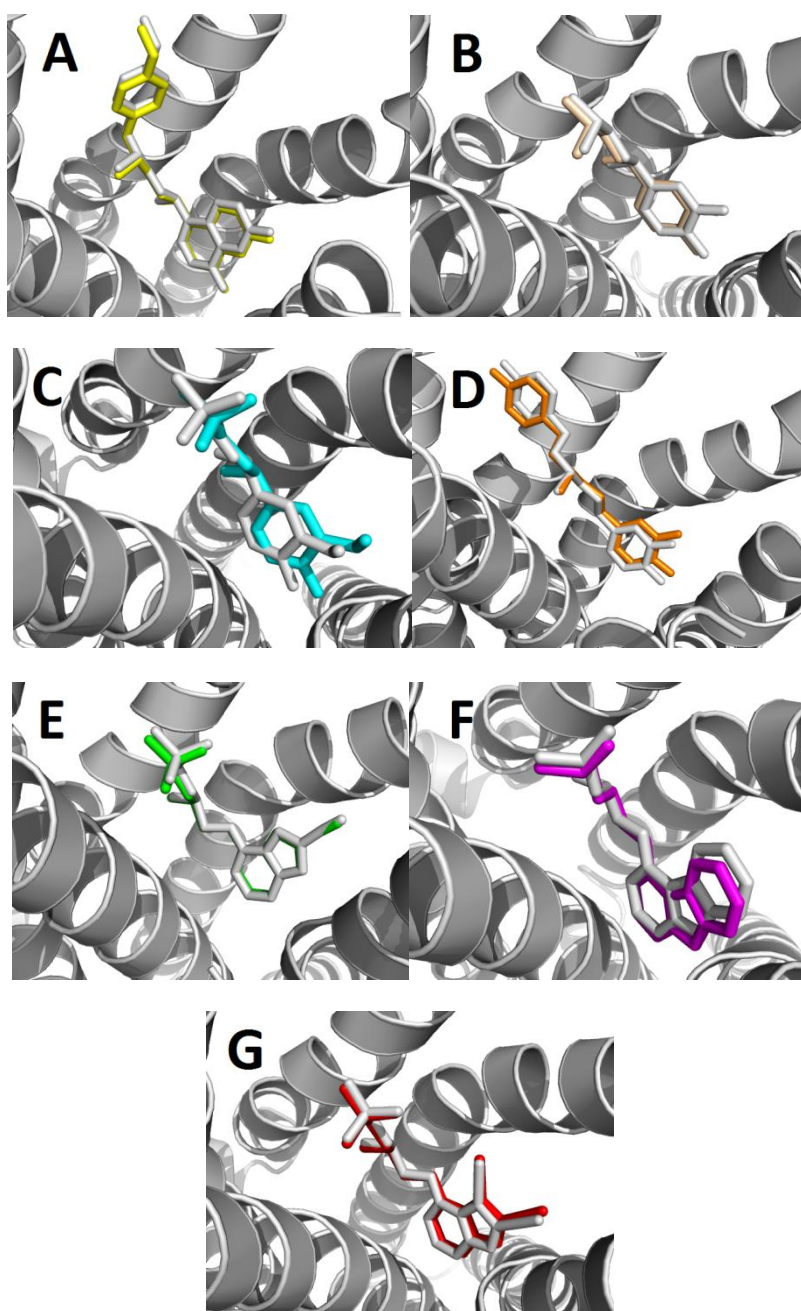

**Figure S3.** Docking poses of seven extracted ligands docked to the crystal structure of Mg\_Adrb1. (A) Carmoterol, (B) isoprenaline, (C) salbutamol, (D) dobutamine, (E) cyanopindolol, (F) carazolol, (G)iodocyanopindolol. Crystal structure of Mg\_Adrb1 and its ligands are shown in white.

Electronic Supplementary Material (ESI) for Molecular BioSystems  
 This journal is © The Royal Society of Chemistry 2011

**Table S1.** Every seven TMs of one hundred models built by structures in active and inactive states were compared with the crystal structure of Mg\_Adrb1 in active state.

| Template      | RMSD/Å          |                   |
|---------------|-----------------|-------------------|
|               | Active Template | Inactive Template |
| Hs_A2a        | 1.51±0.01       | 1.53±0.01         |
| Bt_Opn/Bt_Rho | 1.53±0.01       | 1.54±0.01         |
| Hs_Adrb2      | 0.62±0.03       | 0.67±0.03         |

**Table S2.** Every seven TMs of one hundred models built by structures in active and inactive states were compared with the crystal structure of Mg\_Adrb1 in inactive state.

| Template      | RMSD/Å          |                   |
|---------------|-----------------|-------------------|
|               | Active Template | Inactive Template |
| Hs_A2a        | 1.46±0.01       | 1.38±0.02         |
| Bt_Opn/Bt_Rho | 1.49±0.01       | 1.50±0.01         |
| Hs_Adrb2      | 0.59±0.02       | 0.55±0.02         |

**Table S3.** Detailed results of molecular docking experiments with Autodock4.2.

| Templates | Ligand(Crystal structure resolution) |            |                   |                   |                     |                   |                   |                   |
|-----------|--------------------------------------|------------|-------------------|-------------------|---------------------|-------------------|-------------------|-------------------|
|           | Dobutamine(2.50Å)                    |            | Salbutamol(3.05Å) |                   | Isoprenaline(2.85Å) |                   | Carmoterol(2.60Å) |                   |
|           | RMSD                                 | Energy     | RMSD              | Energy            | RMSD                | Energy            | RMSD              | Energy            |
| self      | 0.5±0.01                             | -8.03±0.01 | 0.82±0.01         | -6.51±0.00        | 0.36±0.01           | -6.26±0.00        | 0.46±0.01         | -10.19±0.00       |
| Hs_Adrb2  | <b>1.04±0.04</b>                     | -6.03±0.00 | <b>0.78±0.00</b>  | -4.86±0.00        | 3.10±0.04           | -4.86±0.00        | <b>1.46±0.01</b>  | -7.77±0.00        |
| Tp_Rho    | 2.68±0.02                            | -4.17±0.00 | 4.74±0.00         | -6.42±0.00        | 4.04±0.01           | <b>-5.18±0.00</b> | 4.13±0.01         | -4.97±0.00        |
| Hs_Aa2ar  | 5.69±0.00                            | -5.45±0.00 | 4.18±0.00         | -5.21±0.00        | 4.36±0.06           | -4.44±0.01        | 2.75±0.00         | -4.50±0.00        |
| Multiple1 | 1.24±0.01                            | -7.42±0.00 | 1.09±0.00         | <b>-6.49±0.00</b> | <b>1.27±0.00</b>    | -4.58±0.00        | 1.97±0.01         | <b>-7.96±0.00</b> |
| Multiple2 | 1.93±0.01                            | -4.96±0.00 | 1.82±0.00         | -3.53±0.00        | 2.48±0.01           | -3.82±0.00        | 3.2±0.01          | -5.25±0.00        |

| Templates | Ligand(Crystal structure resolution) |                   |                  |                   |                          |                   |
|-----------|--------------------------------------|-------------------|------------------|-------------------|--------------------------|-------------------|
|           | Cyanopindolol(2.70Å)                 |                   | Carazolol(3.00Å) |                   | Indocyanopindolol(2.65Å) |                   |
|           | RMSD                                 | Energy            | RMSD             | Energy            | RMSD                     | Energy            |
| self      | 0.35±0.02                            | -8.57±0.00        | 0.53±0.00        | -9.86±0.00        | 0.28±0.01                | -9.28±0.00        |
| Hs_Adrb2  | <b>0.60±0.02</b>                     | <b>-8.06±0.00</b> | 0.73±0.00        | -8.33±0.00        | <b>0.53±0.01</b>         | <b>-9.02±0.00</b> |
| Tp_Rho    | 3.26±0.00                            | -5.11±0.00        | 4.92±0.01        | -6.07±0.00        | 1.97±0.00                | -5.92±0.00        |
| Hs_Aa2ar  | 6.02±0.00                            | -5.54±0.01        | 4.69±1.15        | -5.78±0.01        | 5.61±0.00                | -5.36±0.00        |
| Multiple1 | 3.04±0.00                            | -4.62±0.00        | <b>0.63±0.00</b> | <b>-9.97±0.00</b> | 0.77±0.00                | -10.4±0.00        |
| Multiple2 | 3.83±0.00                            | -5.02±0.01        | 1.99±0.00        | -5.23±0.00        | 5.63±0.02                | -5.42±0.00        |
